# Supplementary material for: Phase 1b randomized, double-blind study of namilumab, an anti-granulocyte macrophage colony-stimulating factor monoclonal antibody, in mild-to-moderate rheumatoid arthritis
Source: Springer Nature journal article supplement (doi:10.1186/s13075-017-1267-3), 2017-03-08

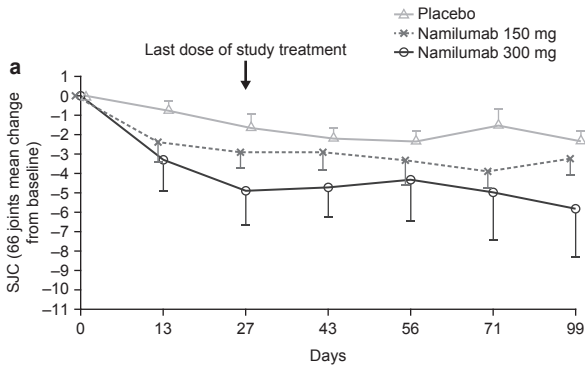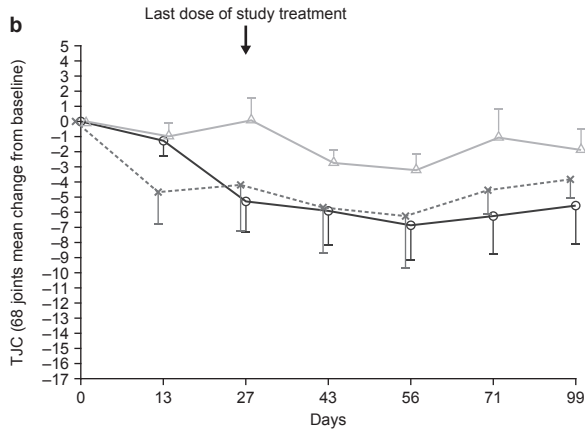

Supplement: MOESM3 [file 12129290]
